## Research Article

# Comparative analysis of the complete mitochondrial genomes of three rockfishes (*Scorpaeniformes*, *Sebastiscus*) and insights into the phylogenetic relationships of Sebastidae

 Chenghao Jia<sup>1</sup>,  Xiumei Zhang<sup>1,2</sup>,  Shengyong Xu<sup>3</sup>, Tianyan Yang<sup>3</sup>, Takashi Yanagimoto<sup>4</sup> and  Tianxiang Gao<sup>3</sup>

<sup>1</sup>Key Laboratory of Mariculture, Ministry of Education, Ocean University of China, Qingdao, Shandong, China; <sup>2</sup>Function Laboratory for Marine, Fisheries Science and Food Production Processes, Qingdao National Laboratory for Marine Science and Technology, Qingdao, Shandong, China; <sup>3</sup>Fishery College, Zhejiang Ocean University, Zhoushan, Zhejiang, China; <sup>4</sup>National Research Institute of Fisheries Science, Japan Fisheries Research and Education Agency, Yokohama, Kanagawa, Japan

**Correspondence:** Tianxiang Gao (gaotianxiang0611@163.com)

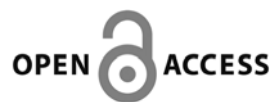

Mitochondrial genome is a powerful molecule marker to provide information for phylogenetic relationships and revealing molecular evolution in ichthyological studies. *Sebastiscus* species, a marine rockfish, are of essential economic value. However, the taxonomic status and phylogenetic relationships of Sebastidae have been controversial so far. Here, the mitochondrial genomes (mitogenomes) of three species, *S. tertius*, *S. albofasciatus*, and *S. marmoratus*, were systemically investigated. The lengths of the mitogenomes' sequences of *S. tertius*, *S. albofasciatus*, and *S. marmoratus* were 16910, 17056, and 17580 bp, respectively. It contained 13 protein-coding genes (PCGs), two ribosomal RNAs (rRNAs), 22 transfer RNA (tRNA) genes, and one identical control region (D-loop) among the three species. The genetic distance and  $K_a/K_s$  ratio analyses indicated 13 PCGs were suffering purifying selection and the selection pressures were different from certain deep-sea fishes, which were most likely due to the difference in their living environment. The phylogenetic tree was constructed by Bayesian Inference (BI) and Maximum Likelihood (ML). Most interestingly, the results indicated that Sebastidae and Scorpaenidae were grouped into a separate branch, so the taxonomic status of Sebastidae should be classified into subfamily Sebastinae. Our results may lead to a taxonomic revision of Scorpaenoidei.

## Introduction

The family Sebastidae belongs to Scorpaeniformes, commonly known as rockfishes or false kelpfishes, comprises 7 genera and approximately 133 species, and it is a diverse and economically important group distributed in Atlantic, Indian, and Pacific Oceans [1]. Sebastidae has become one of the most important marine fishes due to its huge economic value and high biodiversity. However, there is still no consensus about the taxonomic status of Sebastidae up to now. Some authors considered Sebastidae as a family of the order Scorpaeniformes [2–6]. By contrast, some authorities recognized it as a subfamily of Scorpaenidae [7–12]. Besides, the databases that are widely referenced also showed different results, like Fish-Base (<https://www.fishbase.se>) acknowledged the validity of Sebastidae, but Integrated Taxonomic Information System (ITIS) (<https://www.itis.gov>) is opposed to this opinion. Before the conclusion, it will be unified use of the appellation 'Sebastidae' in the present study.

Received: 26 September 2020  
Revised: 26 November 2020  
Accepted: 26 November 2020

Accepted Manuscript online:  
27 November 2020  
Version of Record published:  
14 December 2020



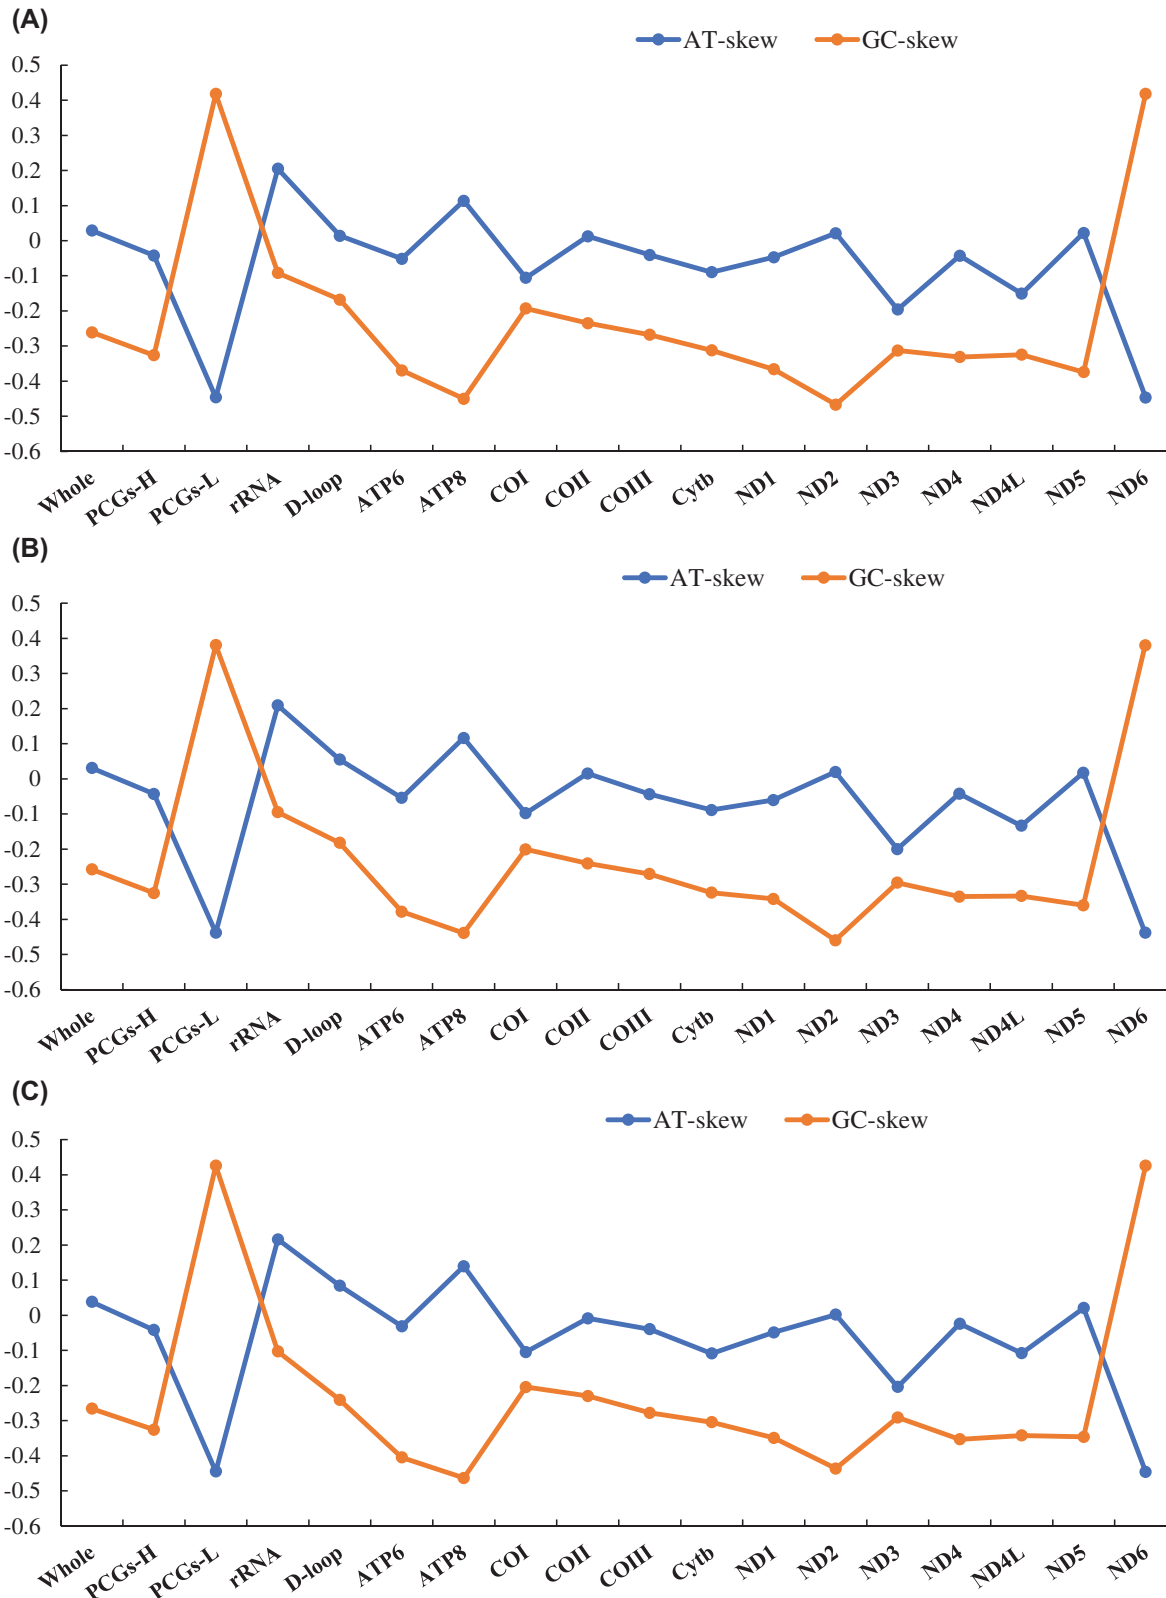

**Figure 2. The nucleotide skewness of three species of *Sebastisucs***

(A) *S. tertius*; (B) *S. albofasciatus*; (C) *S. marmoratus*. The incomplete T-/TA- of the stop codon is not included.

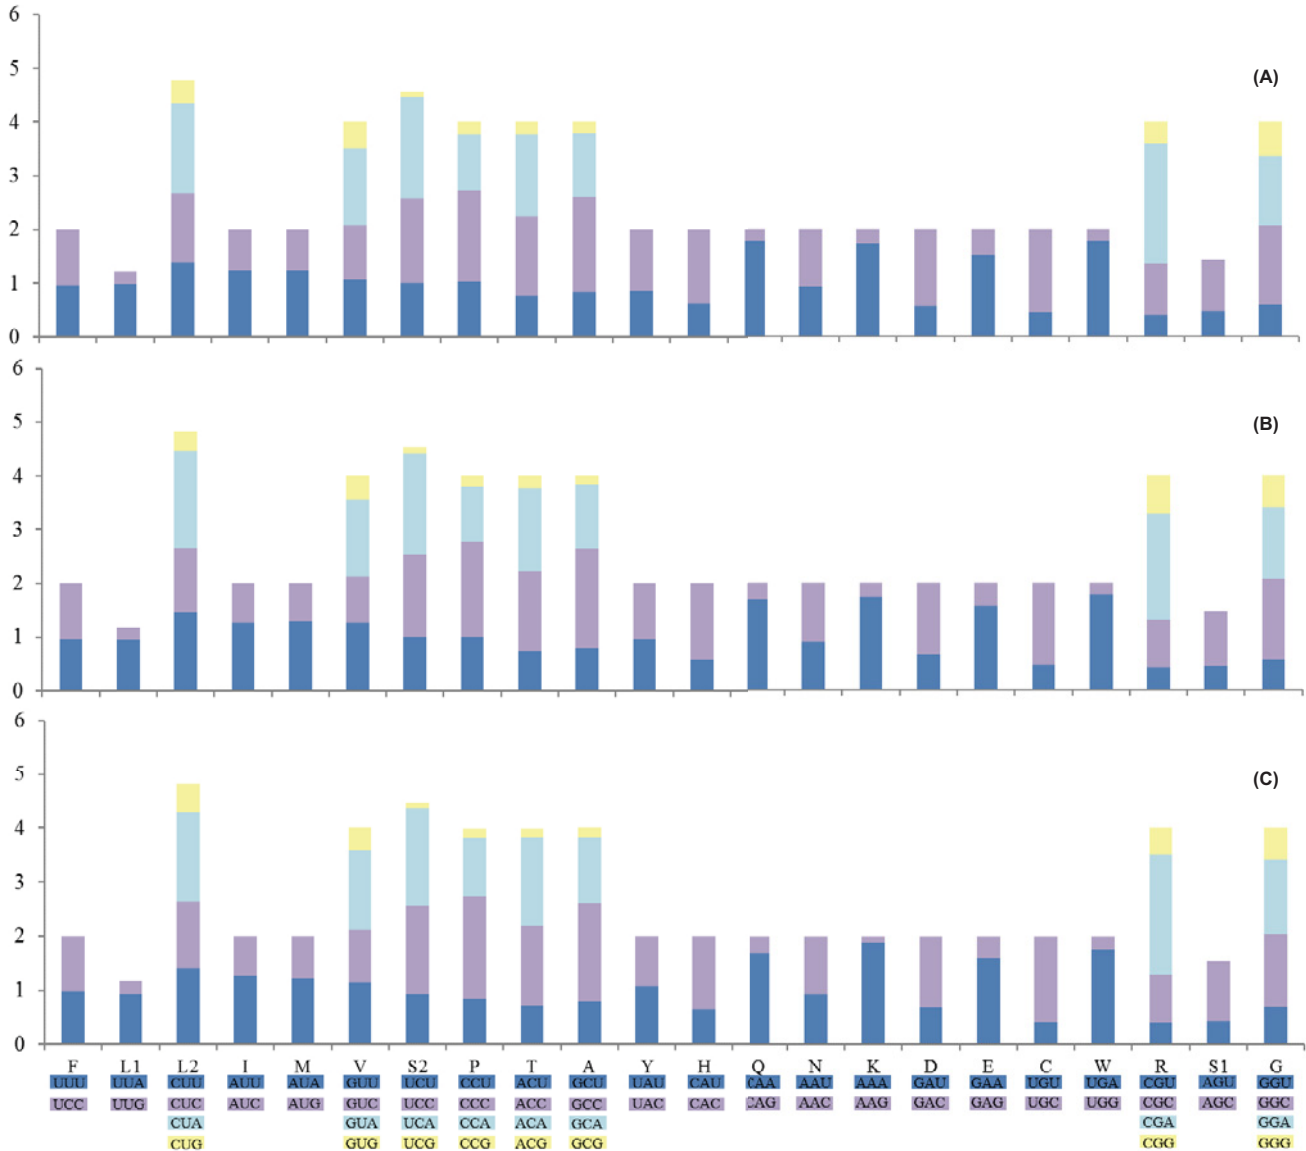

**Figure 3. The RSCU in three *Sebastiscus* mitogenomes**

The RSCU of the mitogenome in *S. tertius* (A), *S. albofasciatus* (B), and *S. marmoratus* (C). Codon families are labeled on the x-axis. The termination codon is not given.

120.2016°E) during May 2019, and coastal waters of Kozagawa in Japan (coordinates: 33.4145°N, 135.7524°E) during June 2019, respectively. All samples were identified based on morphological characteristics (Katoh and Tokimura (2001) [10]; Morishita et al. (2018) [6]) and stored at  $-20^{\circ}\text{C}$  for further study. Muscle tissue was taken from the tails of each sample and digested using proteinase K (Merck, Germany). Genomic DNA was isolated following a standard phenol–chloroform method and detected by 2.0% agarose electrophoresis. DNA precipitation was dissolved in double-distilled water and stored at  $4^{\circ}\text{C}$  after concentration quantification. The study protocol was approved by the Experimental Animal Ethics Committee of the Ocean University of China.

## PCR amplification and sequencing

Three *Sebastiscus* mitogenomes were amplified with 34 pairs of *Sebastiscus*-specific universal primer sets (Supplementary Table S1) and 4 pairs of specific primer sets (Supplementary Table S2) which were designed based upon the mitochondrial genome sequence of *S. marmoratus* (accession no. KF667491) by Primer Premier 6.0 [36]. We used

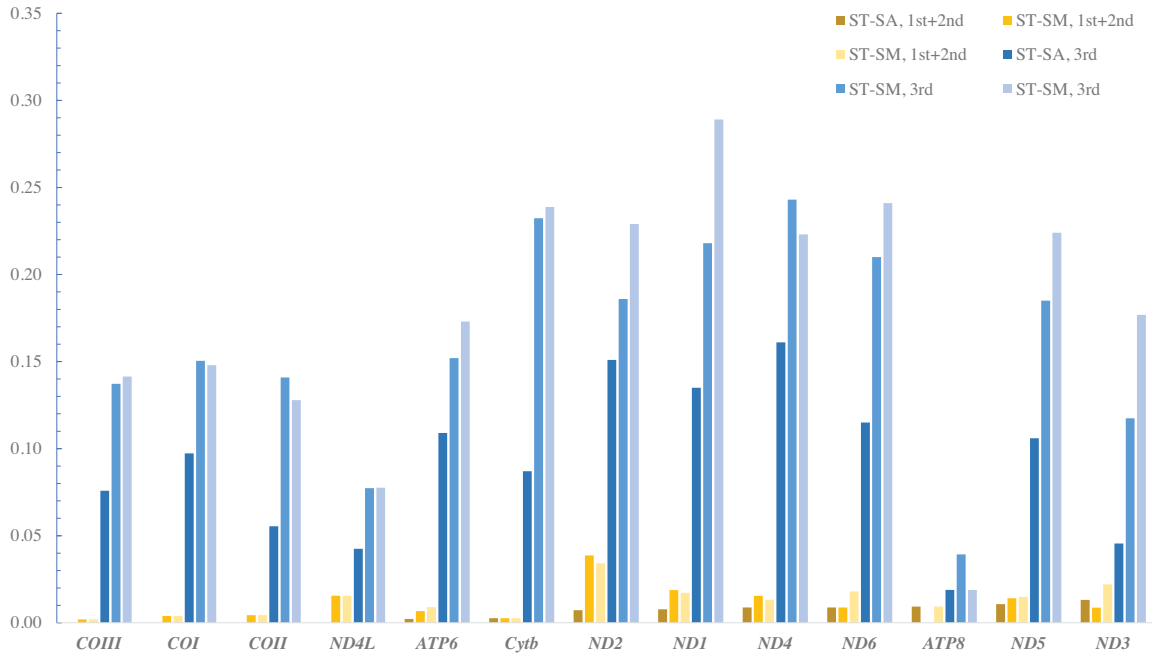

**Figure 4.** The pair genetic distances of 13 PCGs among *S. tertius* (ST), *S. albob fasciatus* (SA), and *S. marmoratus* (SM). The values were calculated based on the first and second nucleotide position, and on the third nucleotide position, respectively.

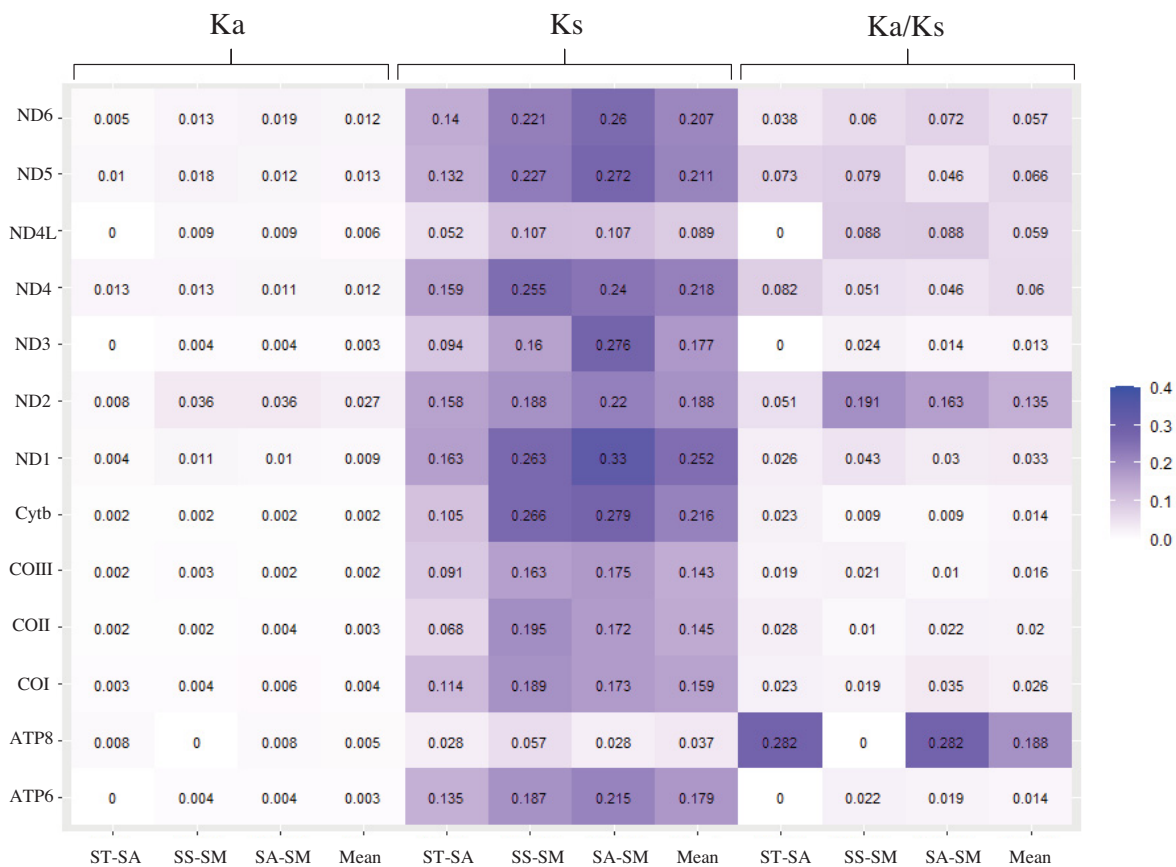

**Figure 5.** The rates of nonsynonymous substitutions and synonymous substitutions for each PCG in pairwise mitochondrial genome of *S. tertius* (ST), *S. albob fasciatus* (SA), and *S. marmoratus* (SM)

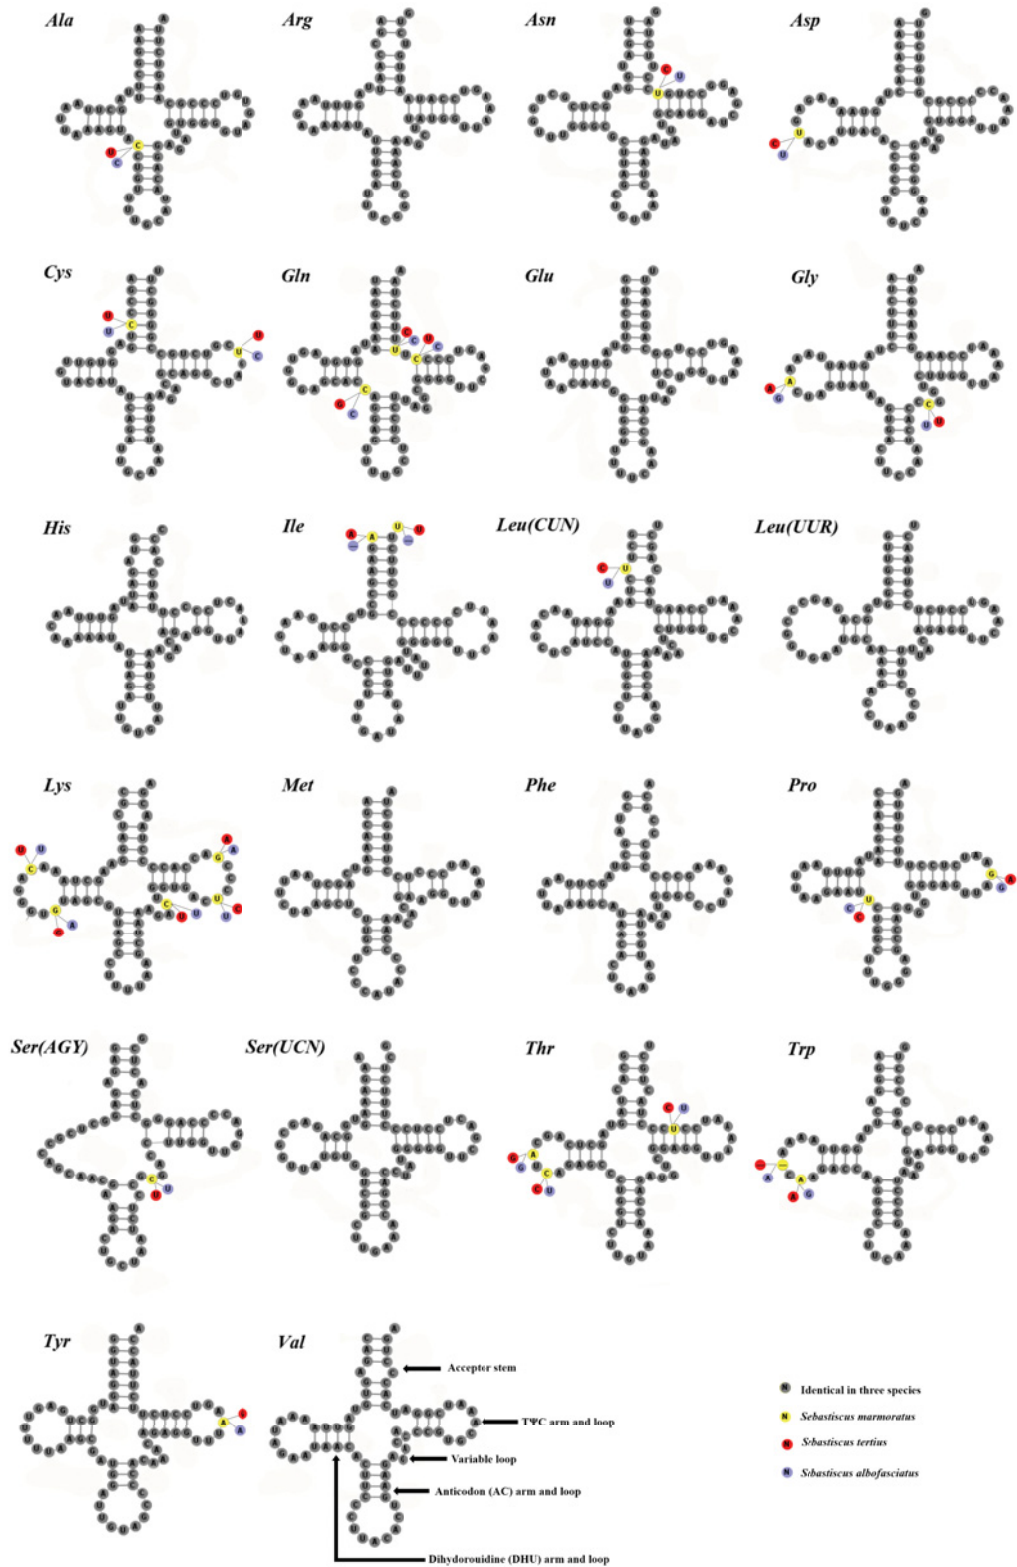

**Figure 6.** Inferred secondary structures of the 22 tRNA genes of *S. marmoratus*, *S. tertius*, and *S. albofasciatus* mitogenomes

Downloaded from <http://port.silverchair.com/bioscierep/article-pdf/40/12/BSR20203379/89859/bsr-2020-3379.pdf> by guest on 17 April 2024

the normal PCR method with Takara Taq DNA polymerase (Takara, China) in a 25- $\mu$ l reaction volume including 17.5  $\mu$ l of ultrapure water, 2.5  $\mu$ l of 10 $\times$  PCR buffer, 2  $\mu$ l of dNTPs, 1  $\mu$ l of each primer (5  $\mu$ mol/l), 0.15  $\mu$ l of Taq polymerase, and 1  $\mu$ l of DNA template. PCR amplification was carried out in a Biometra thermal cycler (Göttingen, Germany) under the following conditions: 5 min initial denaturation at 95°C, and 35 cycles of 45 s at 94°C for denaturation, 45 s at 53°C for annealing, and 45 s at 72°C for an extension, and a final extension at 72°C for 10 min. All PCR products were sequenced in both directions using the primer-walking method by Qingdao Qingke Biotechnology Co. Ltd. (Qingdao, China).

## Mitogenome annotation and sequence analyses

SeqMan (DNASTar, U.S.A.) software was used to manually correct and compare the contiguous sequence fragments, then splice the complete mitogenome sequence and calculate the full length of mitogenome. The starting and ending positions of each gene were determined by comparing the full mitogenome sequence of *S. marmoratus* (Accession no. KF667491) published in GenBank (<https://www.ncbi.nlm.nih.gov/genbank/>). Online software tRNAscan-SE2.0 (<https://lowelab.ucsc.edu/tRNAscan-SE>) was used to identify the transfer RNA (tRNA) gene and predict the secondary structure diagram of tRNA [37]. The online software Tandem Repeats Finder [38] was used to search and analyze the tandem repeats in the control region. The O<sub>L</sub> and tandem repeat structures were simulated and drawn by RNAstructure6.2 software. All complete mitogenomes were preliminarily annotated and drawn the mitochondrial genome map by Mitofish (<https://mitofish.aori.u-tokyo.ac.jp>) [39,40].

The composition of complete mitochondrial genome sequence and each segment (including the non-coding region, ribosomal RNA (rRNA), tRNA, and the PCGs) were calculated by MEGA5.0 software [41], and the PCG codon and base content were determined. Composition skewness of each segment was calculated by the following formulas: AT-skew = (A - T)/(A + T); GC-skew = (G - C)/(G + C).

## Phylogenetic analyses

In order to discuss the phylogenetic relationships of Sebastidae and explore the taxonomic status of *Sebastiscus* in Scorpaenoidei, mitogenomes of 33 previously sequenced Scorpaenoidei and 2 previously sequenced Gobiidae species (with the latter as the outgroup taxon; Table 1) were used in the phylogenetic analyses. We used the nucleotide sequences of the 13 PCGs as the dataset to construct the phylogenetic tree. Sequences were aligned using SeqMan from DNASTar software (U.S.A.). The optimal model for nucleotide sequences was estimated by MEGA 5.0 (Tamura et al. 2011). TN93 + G + I captured the minimum values of Bayesian Information Criterion (BIC) and it was considered to be the best model for phylogenetic tree construction. The Maximum Likelihood (ML) phylogenetic tree was constructed by MEGA 5.0 software with 1000 replicates of bootstrap and the Bayesian Inference (BI) analysis was inferred by the software of MrBayes 3.2.6 based on 10000000 generations [42]. The divergence time was predicted by MEGA 10 [43] with the ML method of RelTime. The calibration of divergence times was obtained from online Time Tree database (<http://www.timetree.org/>) [44].

## Results and discussion

### Mitogenome organization and composition

The complete mitochondrial genomes of *S. albofasciatus* (Accession no. MT117230), *S. tertius* (Accession no. MT117231), and *S. marmoratus* (Accession no. MT789709) in GenBank were 17056, 16910, and 17580 bp in length, respectively (Figure 1). The size variation of the three mitogenomes was mainly caused by the differences in the lengths of the non-coding regions. Of all 36 sequenced Scorpaenoidei mitogenomes, the length of the mitogenome of *Sebastes koreanus* (17606 bp) was the longest, whereas that of *Sebastes oblongus* (16396 bp) was the shortest. The mitogenome lengths of five Scorpaenoidei species were longer (>17000 bp) because of a longer control region (>1300 bp). The mitogenome of *S. albofasciatus* contained the typical 37 genes (13 PCGs, 22 tRNAs, and 2 rRNAs), 1 control region, and 1 OL. The mitogenome of *S. tertius* and *S. marmoratus* had the same composition (Table 2). Most mitochondrial genes were encoded on the H-strand, except for ND6 and eight tRNA (Glu, Ala, Asn, Cys, Tyr, Ser-UCN, Gln, and Pro) genes that were encoded on the L-strand. The nucleotide composition of *S. albofasciatus*, *S. tertius*, and *S. marmoratus* mitogenomes had a higher A+T bias of 55.15, 55.04, and 55.30%, respectively, and both showed positive AT-skew and negative GC-skew (Figure 2 and Supplementary Table S3).

### PCGs and codon usages

All the 13 PCGs in the mitogenomes of the three rockfishes were similar to those of other vertebrates. Twelve PCGs (*ND1*, *ND2*, *COI*, *COII*, *ATP8*, *ATP6*, *COIII*, *ND3*, *ND4L*, *ND4*, *ND5*, and *CYTb*) were coded on the heavy strand

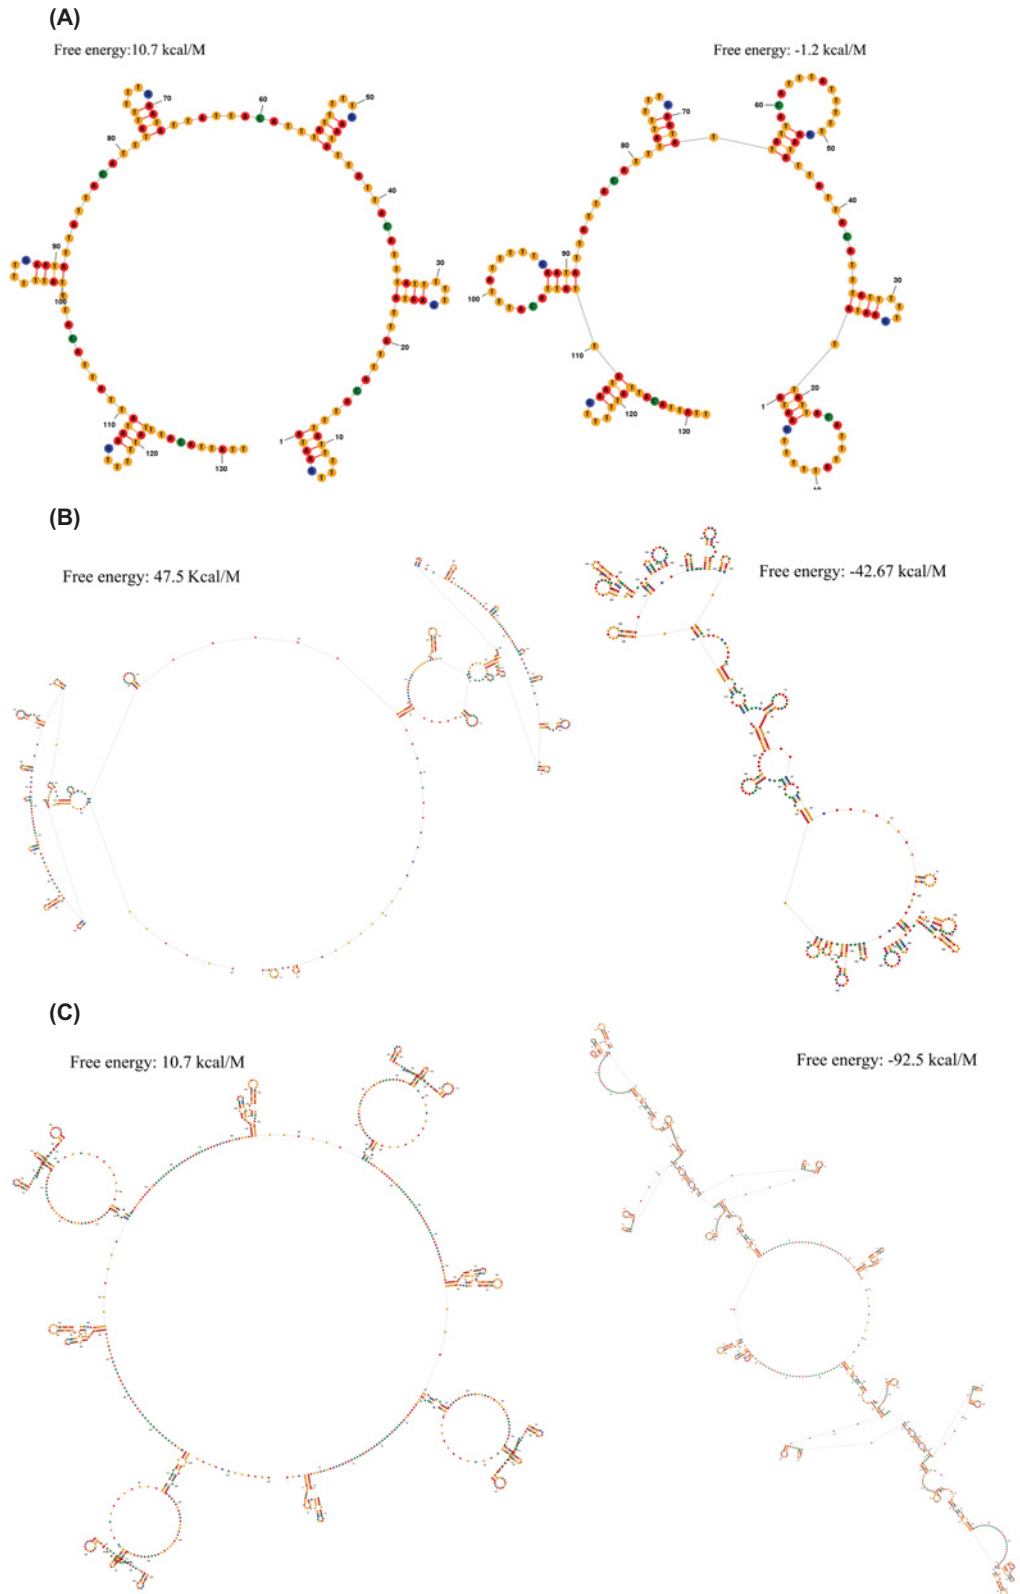

**Figure 7. Predicted secondary structure and free energy of tandem repeat sequences about *S. tertius* (A), *S. albob fasciatus* (B), and *S. marmoratus* (C)**

On the left is Maximum Expected Accuracy (MEA) and the right is Minimum Free Energy (MFE).



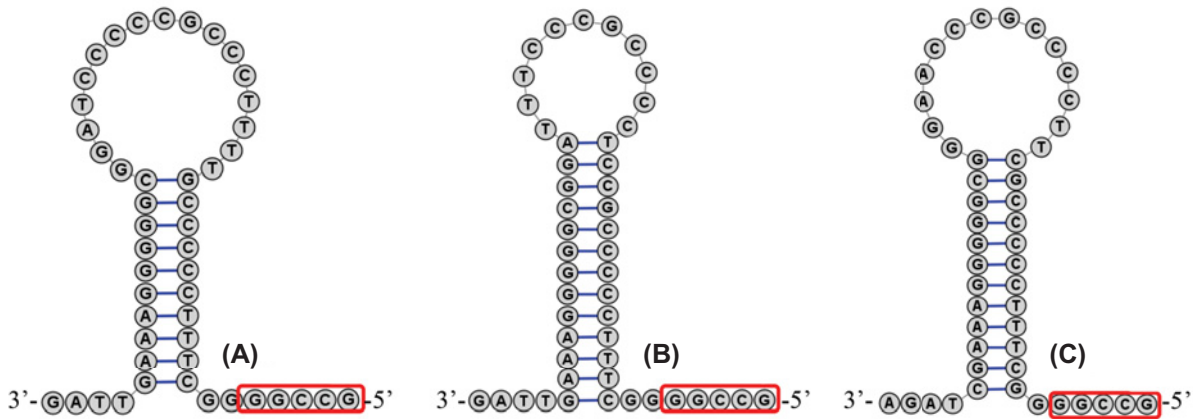

**Figure 8.** Inferred secondary structures of the OL of *Sebastiscus* mitogenome, *S. tertius* (A), *S. albofasciatus* (B), and *S. marmoratus* (C)

**Table 1** Information of the complete mitogenome sequences cited in this study

| Family (Latin name)           | Species (Latin name)                 | GenBank number                 | Length (bp) |
|-------------------------------|--------------------------------------|--------------------------------|-------------|
| Sebastidae                    | <i>Sebastes oblongus</i>             | KF836441                       | 16396       |
|                               | <i>Sebastes fasciatus</i>            | KX897946                       | 16400       |
|                               | <i>Sebastes thompsoni</i>            | KJ834064                       | 16405       |
|                               | <i>Sebastes trivittatus</i>          | KJ834062                       | 16409       |
|                               | <i>Sebastes pachycephalus</i>        | KF836442                       | 16415       |
|                               | <i>Sebastes longispinis</i>          | KJ834061                       | 16445       |
|                               | <i>Sebastes taczanowskii</i>         | KJ525744                       | 16452       |
|                               | <i>Sebastes hubbsi</i>               | KJ525745                       | 16453       |
|                               | <i>Sebastes vulpes</i>               | KJ525743                       | 16462       |
|                               | <i>Sebastes owstoni</i>              | KJ834063                       | 16465       |
|                               | <i>Sebastes inermis</i>              | KF725093                       | 16504       |
|                               | <i>Sebastes schlegelii</i>           | AY491978                       | 16525       |
|                               | <i>Sebastes minor</i>                | MH378782                       | 16850       |
|                               | <i>Sebastes rubrivinctus</i>         | MH378777                       | 16896       |
|                               | <i>Sebastes nigrocinctus</i>         | MH378778                       | 16922       |
|                               | <i>Sebastes aleutianus</i>           | MH378781                       | 17038       |
|                               | <i>Sebastes steindachneri</i>        | MH378779                       | 17109       |
|                               | <i>Sebastes koreanus</i>             | KJ775792                       | 17606       |
|                               | <i>Helicolenus avius</i>             | NC020349                       | 16651       |
|                               | Scorpaenidae                         | <i>Helicolenus hilgendorfi</i> | AP002948    |
| <i>Pterois miles</i>          |                                      | LK022697                       | 16497       |
| <i>Pterois volitans</i>       |                                      | KJ739816                       | 16500       |
| <i>Parapterois heterura</i>   |                                      | LC493917                       | 16475       |
| <i>Scorpaenopsis ramaraoi</i> |                                      | LC493915                       | 16972       |
| Peristediidae                 | <i>Scorpaenopsis cirrosa</i>         | KR701907                       | 16966       |
|                               | <i>Satyrichthys amiscus</i>          | AP004441                       | 16526       |
| Triglidae                     | <i>Chelidonichthys kumu</i>          | KY379222                       | 16495       |
|                               | <i>Pterygotrigla hemisticta</i>      | LC493913                       | 16499       |
|                               | <i>Pterygotrigla ryukyuensis</i>     | LC495487                       | 16508       |
|                               | <i>Lepidotrigla kanagashira</i>      | MK784116                       | 16504       |
|                               | <i>Lepidotrigla guentheri</i>        | LC493914                       | 16509       |
|                               | <i>Lepidotrigla hime</i>             | MN104592                       | 16606       |
|                               | <i>Lepidotrigla microptera</i>       | KY012348                       | 16610       |
| Gobiidae                      | <i>Parapocryptes serperaster</i>     | KT965855                       | 17243       |
|                               | <i>Boleophthalmus pectinirostris</i> | NC016195                       | 17111       |

**Table 2 Summary of gene/element feature of *S. tertius* (ST), *S. albobasicius* (SA) and *S. marmoratus* (SM)**

| Gene/Region              | Position start |       |       | Position end |       |       | Size (bp) |      |      | Intervening spacer (bp)* |     |     | Amino acid |     |     | Initial codon |     |     | Terminal codon |     |     | Letter Strandcode |    |
|--------------------------|----------------|-------|-------|--------------|-------|-------|-----------|------|------|--------------------------|-----|-----|------------|-----|-----|---------------|-----|-----|----------------|-----|-----|-------------------|----|
|                          | ST             | SA    | SM    | ST           | SA    | SM    | ST        | SA   | SM   | ST                       | SA  | SM  | ST         | SA  | SM  | ST            | SA  | SM  | ST             | SA  | SM  |                   |    |
| tRNA <sup>Phe</sup>      | 1              | 1     | 1     | 68           | 68    | 68    | 68        | 68   | 68   | 0                        | 0   | 0   |            |     |     |               |     |     |                |     |     | H                 | F  |
| 12S rRNA                 | 69             | 69    | 69    | 1015         | 1014  | 1014  | 947       | 946  | 946  | 0                        | 0   | 0   |            |     |     |               |     |     |                |     |     | H                 | V  |
| tRNA <sup>Val</sup>      | 1016           | 1015  | 1015  | 1087         | 1086  | 1086  | 72        | 72   | 72   | 0                        | 0   | 0   |            |     |     |               |     |     |                |     |     | H                 | V  |
| 16S rRNA                 | 1088           | 1087  | 1087  | 2779         | 2778  | 2778  | 1692      | 1692 | 1692 | 0                        | 0   | 0   |            |     |     |               |     |     |                |     |     | H                 | L1 |
| tRNA <sup>Leu(UUR)</sup> | 2780           | 2779  | 2779  | 2853         | 2852  | 2852  | 74        | 74   | 74   | 0                        | 0   | 0   |            |     |     |               |     |     |                |     |     | H                 | L1 |
| ND1                      | 2854           | 2853  | 2853  | 3828         | 3827  | 3827  | 975       | 975  | 975  | 3                        | 5   | 3   | 324        | 324 | 324 | ATG           | ATG | ATG | TAG            | TAA | TAA | H                 |    |
| tRNA <sup>Ile</sup>      | 3832           | 3833  | 3831  | 3903         | 3902  | 3902  | 72        | 70   | 72   | -2                       | -1  | -2  |            |     |     |               |     |     |                |     |     | H                 | I  |
| tRNA <sup>Gln</sup>      | 3902           | 3902  | 3901  | 3972         | 3972  | 3972  | 71        | 71   | 72   | -1                       | -1  | -2  |            |     |     |               |     |     |                |     |     | L                 | Q  |
| tRNA <sup>Met</sup>      | 3972           | 3972  | 3971  | 4042         | 4042  | 4041  | 71        | 71   | 71   | 0                        | 0   | 0   |            |     |     |               |     |     |                |     |     | H                 | M  |
| ND2                      | 4043           | 4043  | 4042  | 5088         | 5088  | 5087  | 1046      | 1046 | 1046 | 0                        | 0   | 0   | 348        | 348 | 348 | ATG           | ATG | ATG | TA             | TA  | TA  | H                 |    |
| tRNA <sup>Trp</sup>      | 5089           | 5089  | 5088  | 5159         | 5160  | 5158  | 71        | 71   | 71   | 1                        | 1   | 1   |            |     |     |               |     |     |                |     |     | H                 | W  |
| tRNA <sup>Ala</sup>      | 5161           | 5162  | 5160  | 5229         | 5230  | 5228  | 69        | 69   | 69   | 1                        | 1   | 1   |            |     |     |               |     |     |                |     |     | L                 | A  |
| tRNA <sup>Asn</sup>      | 5231           | 5232  | 5230  | 5303         | 5304  | 5302  | 73        | 73   | 73   | 1                        | 1   | 0   |            |     |     |               |     |     |                |     |     | L                 | N  |
| O <sub>L</sub>           | 5305           | 5306  | 5303  | 5341         | 5342  | 5340  | 37        | 37   | 38   | -3                       | -3  | -4  |            |     |     |               |     |     |                |     |     | H                 |    |
| tRNA <sup>Cys</sup>      | 5339           | 5340  | 5337  | 5405         | 5406  | 5403  | 67        | 65   | 67   | 2                        | 2   | 2   |            |     |     |               |     |     |                |     |     | L                 | C  |
| tRNA <sup>Tyr</sup>      | 5408           | 5409  | 5406  | 5478         | 5479  | 5476  | 69        | 71   | 71   | 1                        | 1   | 1   |            |     |     |               |     |     |                |     |     | L                 | Y  |
| COI                      | 5480           | 5481  | 5478  | 7030         | 7031  | 7028  | 1551      | 1551 | 1551 | 0                        | 0   | 0   | 516        | 516 | 516 | GTG           | GTG | GTG | TAA            | TAA | TAA | H                 |    |
| tRNA <sup>Ser(UCN)</sup> | 7031           | 7032  | 7029  | 7101         | 7102  | 7099  | 71        | 69   | 71   | 3                        | 3   | 3   |            |     |     |               |     |     |                |     |     | L                 | S  |
| tRNA <sup>Asp</sup>      | 7105           | 7106  | 7103  | 7177         | 7178  | 7175  | 73        | 73   | 73   | 6                        | 6   | 6   |            |     |     |               |     |     |                |     |     | H                 | D  |
| COII                     | 7184           | 7185  | 7182  | 7874         | 7875  | 7872  | 691       | 691  | 691  | 0                        | 0   | 0   | 230        | 230 | 230 | ATG           | ATG | ATG | T              | T   | T   | H                 |    |
| tRNA <sup>Lys</sup>      | 7875           | 7876  | 7873  | 7948         | 7949  | 7946  | 74        | 74   | 74   | 1                        | 1   | 1   |            |     |     |               |     |     |                |     |     | H                 | K  |
| ATPase $\beta$           | 7950           | 7951  | 7948  | 8117         | 8118  | 8115  | 168       | 168  | 168  | -10                      | -10 | -10 | 55         | 55  | 55  | ATG           | ATG | ATG | TAA            | TAA | TAA | H                 |    |
| ATPase $\delta$          | 8108           | 8109  | 8106  | 8790         | 8791  | 8788  | 683       | 683  | 683  | 0                        | 0   | 0   | 227        | 227 | 227 | ATG           | ATG | ATG | TA             | TA  | TA  | H                 |    |
| COIII                    | 8791           | 8792  | 8789  | 9575         | 9576  | 9573  | 785       | 785  | 785  | 0                        | 0   | 0   | 261        | 261 | 261 | ATG           | ATG | ATG | TA             | TA  | TA  | H                 |    |
| tRNA <sup>Gly</sup>      | 9576           | 9577  | 9574  | 9647         | 9648  | 9645  | 72        | 72   | 72   | 0                        | 0   | 0   |            |     |     |               |     |     |                |     |     | H                 | G  |
| ND3                      | 9648           | 9649  | 9646  | 9996         | 9997  | 9994  | 349       | 349  | 349  | 0                        | 0   | 0   | 116        | 116 | 116 | ATG           | ATG | ATG | T              | T   | T   | H                 |    |
| tRNA <sup>Arg</sup>      | 9997           | 9998  | 9995  | 10065        | 10066 | 10063 | 69        | 69   | 69   | 0                        | 0   | 0   |            |     |     |               |     |     |                |     |     | H                 | R  |
| ND4L                     | 10066          | 10067 | 10064 | 10362        | 10363 | 10360 | 297       | 297  | 297  | -7                       | -7  | -7  | 98         | 98  | 98  | ATG           | ATG | ATG | TAA            | TAA | TAA | H                 |    |
| ND4                      | 10356          | 10357 | 10354 | 11736        | 11737 | 11734 | 1381      | 1381 | 1381 | 0                        | 0   | 0   | 460        | 460 | 460 | ATG           | ATG | ATG | T              | T   | T   | H                 |    |
| tRNA <sup>His</sup>      | 11737          | 11738 | 11735 | 11805        | 11806 | 11803 | 69        | 69   | 69   | 0                        | 0   | 0   |            |     |     |               |     |     |                |     |     | H                 | H  |
| tRNA <sup>Ser(AGY)</sup> | 11806          | 11807 | 11804 | 11873        | 11874 | 11871 | 68        | 72   | 68   | 4                        | 4   | 4   |            |     |     |               |     |     |                |     |     | H                 | S  |
| tRNA <sup>Leu(CUN)</sup> | 11878          | 11879 | 11876 | 11950        | 11951 | 11948 | 73        | 73   | 73   | 0                        | 0   | 0   |            |     |     |               |     |     |                |     |     | H                 | L2 |
| ND5                      | 11951          | 11952 | 11949 | 13789        | 13790 | 13787 | 1839      | 1839 | 1839 | -4                       | -4  | -4  | 612        | 612 | 612 | ATG           | ATG | ATG | TAA            | TAA | TAA | H                 |    |
| ND6                      | 13786          | 13787 | 13784 | 14307        | 14308 | 14305 | 522       | 522  | 522  | 0                        | 0   | 0   | 173        | 173 | 173 | ATG           | ATG | ATG | TAG            | TAG | TAG | L                 |    |
| tRNA <sup>Glu</sup>      | 14308          | 14309 | 14306 | 14376        | 14377 | 14374 | 69        | 69   | 69   | 6                        | 6   | 6   |            |     |     |               |     |     |                |     |     | L                 | E  |
| Cyt <i>b</i>             | 14383          | 14384 | 14381 | 15523        | 15524 | 15521 | 1141      | 1141 | 1141 | 0                        | 0   | 0   | 380        | 380 | 380 | ATG           | ATG | ATG | T              | T   | T   | H                 |    |
| tRNA <sup>Thr</sup>      | 15524          | 15525 | 15522 | 15595        | 15596 | 15593 | 72        | 73   | 72   | -1                       | -1  | -1  |            |     |     |               |     |     |                |     |     | H                 | T  |
| tRNA <sup>Pro</sup>      | 15595          | 15596 | 15593 | 15664        | 15665 | 15662 | 70        | 70   | 70   | 0                        | 0   | 0   |            |     |     |               |     |     |                |     |     | L                 | P  |
| D-loop                   | 15665          | 15666 | 15663 | 16910        | 17056 | 17580 | 1246      | 1391 | 1918 |                          |     |     |            |     |     |               |     |     |                |     |     | H                 |    |

Intervening spacer\* (bp): positive values indicate the interval sequence of adjacent genes, and negative values indicate the overlapping of adjacent genes. H represents heavy strand and L represents light strand.

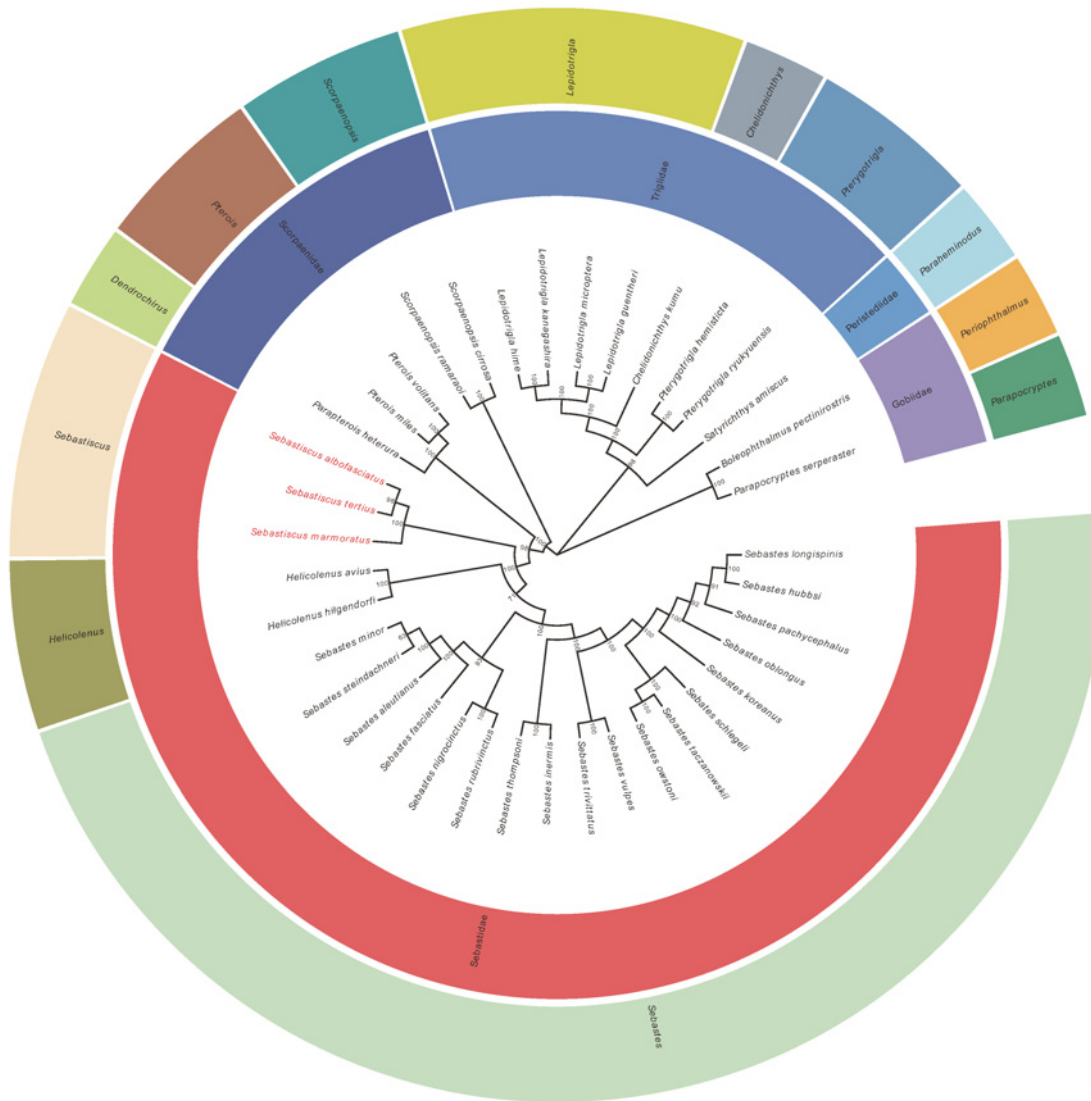

**Figure 9. Phylogenetic tree of 36 Scorpaenoidei species constructed by BI and ML methods based on concatenated sequences of 13 PCGs**

*Boleophthalmus pectinirostris* and *Parapocryptes serperaster* were used as the outgroup. The species in red (Latin name) indicated the sequences generated in the present study. The numbers at nodes showed the Bayesian posterior probabilities.

(H-strand) and the remaining one (ND6) was coded on the light strand (L-strand). The length, codon usage, and A+T content of PCGs in the *S. albofasciatus*, *S. tertius*, and *S. marmoratus* mitogenomes were nearly identical. Among the three mitogenomes, all the 13 PCGs of *Sebastiscus* species encoded 3800 amino acids in total. All the PCGs used the initiation codon ATG except COI used GTG. ATG is an accepted conventional initiation codon for many Osteichthyes mitogenomes including among Scorpaeniformes fishes [45,46]. At the same time, GTG was commonly used as the initiation codon of COI in many other Osteichthyes mitogenomes [47–51]. All three mitogenomes have the same termination codon for 11 PCGs (*ND2*, *COII*, *ATP8*, *ATP6*, *COIII*, *ND3*, *ND4L*, *ND4*, *ND5*, *ND6*, and *CYTb*). TAA were commonly used as the termination codons, although the incomplete termination codons T or TA were found in *ND2*, *COII*, *ATP6*, *COIII*, *ND3*, *ND4*, and *CYTb* in all three mitogenomes. The incomplete termination codon has also been found in all other sequenced Osteichthyes species [48–52]. It has been confirmed

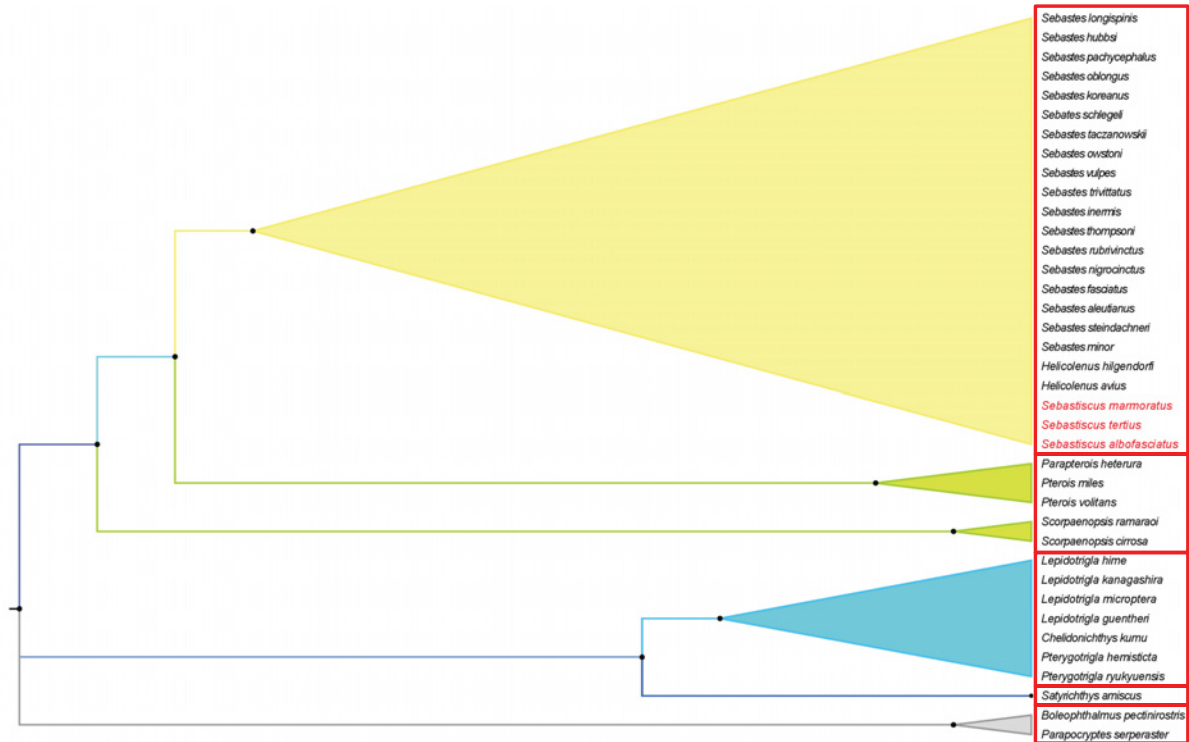

**Figure 10. Phylogenetic relationships about Scorpaenoidei based on BI and ML methods by the concatenated sequences of 13 PCGs**

Each red frame represented a separate family.

that the incomplete termination codons could act as the complete functional termination codons in polyadenylation processes and polycistronic transcription cleavage [29,51,53]. TAG was used as the termination codon of ND6 in the three *Sebastiscus* mitogenomes. Additionally, in the *S. tertius* mitogenome, ND1 used TAG as the termination codon, too. Although TAG is the typical termination codon in many mitogenomes, it is not used frequently, due to the high percentage of AT nucleotide use by the PCGs [32].

The average AT contents of the 13 PCGs in *S. albofasciatus* and *S. tertius* were 54.50 and 54.40%, respectively, and both were similar values to that of *S. marmoratus* (54.54%). The PCGs encoded by the H-strand displayed T-skews (T > A) and C-skews (C > G) whereas the L-strand displayed T-skews and G-skews (G > C). We calculated the RSCU of the three *Sebastiscus* species mitogenomes (Figure 3 and Supplementary Table S4) and the result showed that the frequency of using NNA and NNC (N represents A, T, C, G) were higher than NNT and NNG in *S. albofasciatus*, *S. tertius*, and *S. marmoratus*. The most frequent amino acids in the coding sequences of *S. albofasciatus*, *S. tertius*, and *S. marmoratus* mitochondrial proteins were Leu (CUN), Ala, and Thr (>290) (Supplementary Figure S1). These three amino acids were also frequently used in other Osteichthyes mitogenomes [48–51]. Moreover, the minimally used amino acid in the three mitogenomes was Cys (<30).

## Genetic distance and evolution rates of PCGs

The genetic distance could be used to evaluate different mutation pressures among genes [54]. The pairwise genetic distances (p-distance) were calculated to reveal the sequence conservation and divergence of the PCGs among the *Sebastiscus* species (Figure 4). The genetic distance at the third nucleotide position was obviously higher than the first and second nucleotide position, indicating that the evolution of the third position was faster than the first and the second. The highest p-distance was found in ND1 (0.289) and ND4 (0.243, 0.161) at the third nucleotide of codons, while explored in ND2 (0.039, 0.034) and ND3 (0.013) base on the first and second nucleotide position. The COI-III and ATP8 genes had the low genetic distance in both first + second and third analysis. ND1, ND2, ND3, and ND4 genes might have high evolutionary rates among the three species, while COI-III and ATP8 were low.

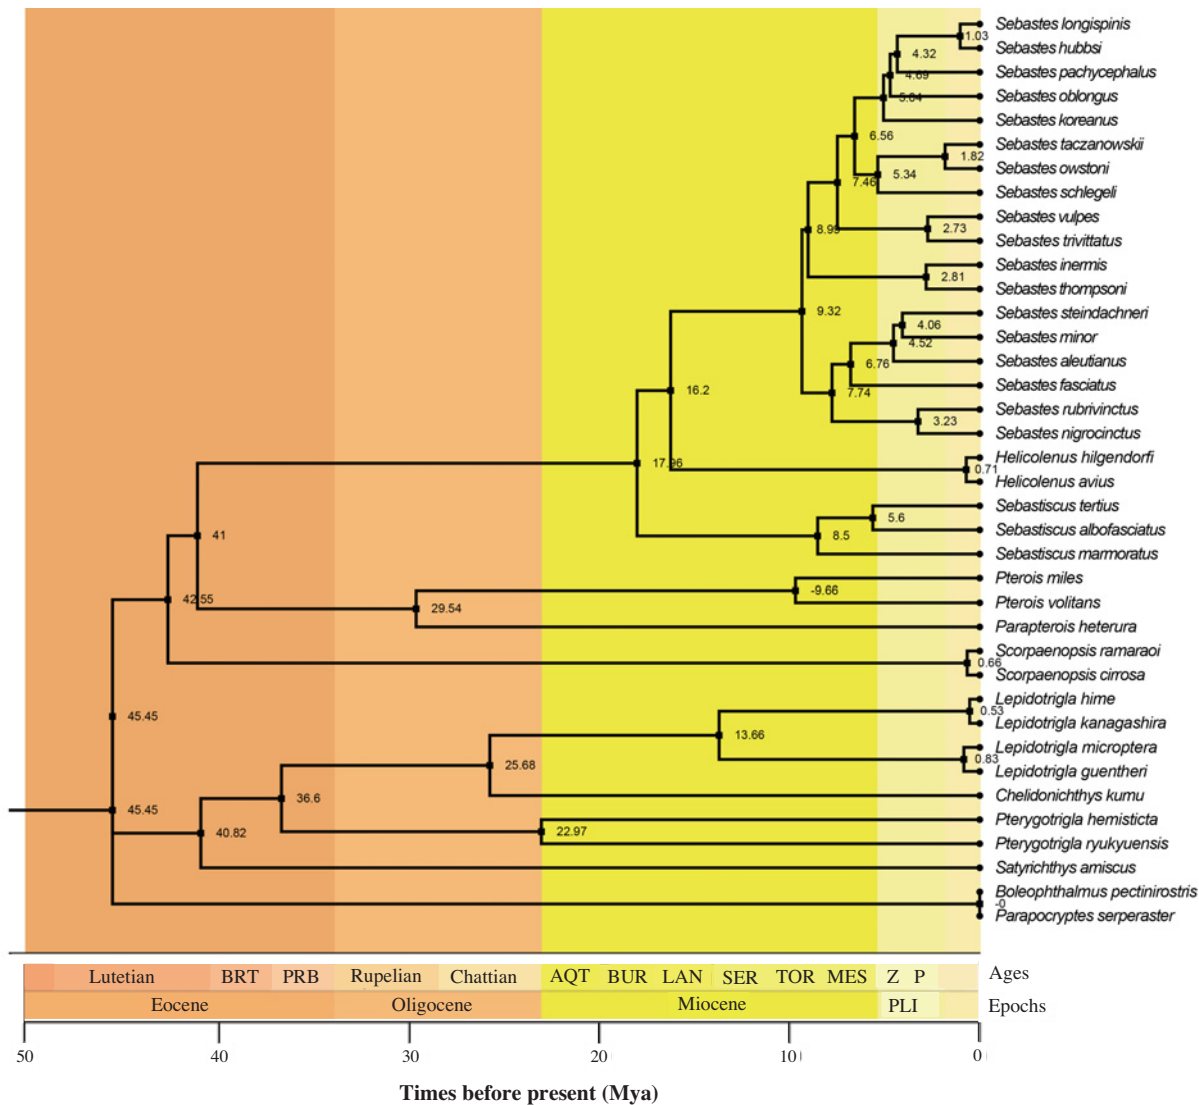

**Figure 11. Divergence time analysis of 36 Scorpaenoidei fish species base on ML topology using concatenated sequences of 13 PCGs**

Numbers near the nodes indicated the estimated divergence time (Mya).

The value of nonsynonymous substitution ( $K_a$ )/synonymous substitution ( $K_s$ ) is a common indicator to assess selective pressure and evolutionary relationships of species in molecular studies [55].  $K_a/K_s < 1$ ,  $K_a/K_s = 1$ , and  $K_a/K_s > 1$  were represented purifying selection, neutral mutation, and positive selection, respectively [56]. All 13 PCG genes were under strong purifying selection with  $K_a/K_s$  values below 1 (Figure 5). The result was different from deep-sea fishes, where most genes exhibited positive selection or convergent/parallel signals with the exception of ND4L and ND5 [57]. One of the reasons might be the different living environment between them. Environmental difference leads to the different expression levels of protein-coding, which involved in energy regulation, reproduction, and immune behaviors [26]. The basic characteristics of genome evolution depended on random genetic drift and mutation pressure that closely connected with the environment [58]. The deep-sea fishes inhabited in the condition of oxygen deficiency, lacked food, no sunlight, and extreme cold, while the *Sebastes* species survived in the warm coastal waters [57,59,60]. Positive selection usually related to the adaptation of new environments and the development of the new function, and most nonsynonymous mutations were disadvantage [61,62]. The  $K_a/K_s$  values in *Sebastes* species showed they were under purifying selection, indicating that the environment variation was not great enough to change their genetic function.

ND2 and ATP8 genes had high  $K_a/K_s$  (mean: 0.135, 0.188) values across three *Sebastiscus* mitogenomes compared with other genes, while ND3, ATP6, and Cytb genes were low (mean: 0.013, 0.014, 0.014). Low mutation rates tended to occur on highly expressed genes due to DNA repair mechanisms [63]. Compared with other genes, the ND3, ATP6, and Cytb showed low  $K_a/K_s$  representing a low mutation rate, indicating that they may have higher expression level.

## rRNAs and tRNAs

Similar to *S. marmoratus*, the mitogenomes of *S. albofasciatus* and *S. tertius* each had one 12S rRNA and one 16SrRNA gene. The 12S rRNA gene was located between tRNA<sup>Phe</sup> and tRNA<sup>Val</sup>, and the 16S rRNA gene was located between tRNA<sup>Val</sup> and tRNA<sup>Leu(UUR)</sup> as also occurs in some other Scorpaeniformes fishes [64,65]. The size of the 12S rRNA in *S. albofasciatus* and *S. marmoratus* were 946 bp, both a little shorter than in *S. tertius* (947 bp). The size of the 16S rRNA was 1692 bp in *S. albofasciatus* and *S. tertius*, which was consistent with *S. marmoratus*. In the *S. tertius* mitogenome, the A+T content of the rRNA genes was the minimum (52.25%) whereas the A+T content of rRNA in the *S. albofasciatus* and *S. marmoratus* mitogenomes were approximately 52.31 and 52.35%, lower than the control region. In three *Sebastiscus* species, the AT-skew of rRNA was strongly positive whereas the GC-skew was slightly negative indicating that the contents of A and C were higher than those of T and G in the rRNA, respectively.

Like the typical set of tRNA genes in Osteichthyes mitogenomes, there were 22 tRNA genes predicted in the three species. All of them had two kinds of tRNA<sup>Leu</sup> and tRNA<sup>Ser</sup> (Table 2). The secondary clover-leaf structures of tRNA genes identified in the mitogenome of *S. tertius*, *S. albofasciatus*, and *S. marmoratus* are shown in Figure 6. These tRNA genes varied in length from 65 to 74 bp. All the predicted tRNAs displayed the typical clover-leaf secondary structure, except for tRNA<sup>Ser(AGY)</sup>, which can not form a stable secondary structure because of lack of the DHU arm [66,67], this structure was common among fish mitogenomes [68].

## Control region

The control region is the largest non-coding region of the fish mitogenome which is equivalent to the A+T-rich region of the insect mitogenome [29,69]. The control regions of *Sebastiscus* mitogenomes were located between tRNA<sup>Pro</sup> and tRNA<sup>Phe</sup> with lengths of 1246 and 1391 bp, respectively (Table 2), much shorter than that of *S. marmoratus* (1918 bp). The length of the control region is variable, which is the main reason for the differences in mitochondrial DNA lengths in fishes [70–72]. In the mitogenomes of *S. tertius* and *S. albofasciatus*, the contents of A+T were 69.34 and 68.01%, respectively, similar to that of *S. marmoratus* (68.81%). The control regions of all three species genomes showed positive AT-skew values while all control regions of the three *Sebastiscus* species displayed negative GC-skew values. Additionally, we found tandem repetitive sequences in all three *Sebastiscus* species by Tandem Repeat Finder V 4.07 (<http://tandem.bu.edu/trf/trf.html>) [38]. The tandem repetitive sequence units of *S. tertius*, *S. albofasciatus* and *S. marmoratus* were 22, 275, and 269 bp, respectively. The secondary structures of tandem repetitive sequence for three species showed that the two kinds of structures can form multiple stem ring structures, respectively (Figure 7). As a non-coding region, the control region of mitochondrial DNA has a low evolutionary pressure. Therefore, it is frequency of base insertion and deletion is high, and the tandem repetitive sequence has often occurred, too. With the accumulation of data, the phenomenon of tandem repetition is becoming more and more frequent in the mitochondrial genome of fish [73]. The formation mechanism has been made some progress, of which slipped-strand mispairing is the most likely mechanism for tandem repeats [74,75]. In this study, the number of the core sequence repetitions in *S. tertius* and *S. albofasciatus* were 6 and 2, respectively, and that of *S. marmoratus* was 4. The difference between tandem repetitive sequence is the main reason the mitogenome lengths of the three species are different. Besides, the control region is responsible for the regulatory functions of DNA replication and transcription, which length variation will inevitably affect its functions and the metabolic frequency of the whole organism, thus resulting in interspecific differences.

## L-strand origin of replication

The L-strand origins of replication ( $O_L$ ) of *S. tertius* and *S. albofasciatus* mitogenomes were located between tRNA<sup>Asn</sup> and tRNA<sup>Cys</sup> with the same lengths of 37 bp, 1 bp shorter than *S. marmoratus* (38 bp). Secondary structures of  $O_L$  were displayed in Figure 8. In these  $O_L$  structures, the use of stem codons showed significant asymmetry, with more pyrimidines at the 5' end of the sequence. Consistent of other studies in fish, all  $O_L$  regions had an identical conserved sequence region at the end of the stem (5'-GCCGG-3') [45,76–78]. This may be related to the mechanism of RNA transformation to DNA [79]. Like found in many fishes, the use frequency of T and C bases in the ring region was higher [76,80].

## Phylogenetic analyses

Phylogenetic relationships were reconstructed based on the sequences of 13 PCGs of 38 mitogenomes using BI and ML methods. The phylogenetic trees constructed by two methods were consistent with high intermediate bootstrap values, post probabilities, and the topological structure of the two phylogenetic trees were basically the same (Figure 9). We found three *Sebastiscus* species (*S. marmoratus*, *S. tertius*, and *S. albofasciatus*) formed a monophyletic group in both the BI and ML analyses. *S. tertius* and *S. albofasciatus* formed a sister group, which together had a sister relationship with *S. marmoratus*. Barsukov and Chen (1978) regarded *Sebastiscus* as a subgenus of *Sebastes* [17]. However, the result of our phylogenetic inference showed that *Helicolenus* are more closely related to *Sebastes* than to *Sebastiscus*. Our results supported the view that *Sebastiscus* should be treated as a genus independent from *Sebastes* which also was supported by some previous studies [11,81–83]. It was the strong evidence that supports the *Sebastiscus* as an independent species.

Sebastidae and Scorpaenidae have been considered as two families by several authors [2–6]. Based on this study, however, if Sebastidae is valid, the family Scorpaenidae was regarded as paraphyletic with its subfamily Pteroinae in a sister relationship with Sebastidae (Figure 10). A number of authors thought that Sebastidae was considered as a subfamily of Scorpaenidae, and had an equal level with Pteroinae and Scorpaeninae [10,81,84]. Such taxonomic division was consistent with our results of phylogenetic relationships.

We estimated the species divergence time estimated using the ML method of RelTime by MEGA 10 (Figure 11). The divergence time calculations indicated that the Scorpaenidae had differentiated from other species ~45.45 million years ago and all the families of Scorpaenoidei began to diverge more than 40 million years ago, except for Sebastidae. The differentiation time of Sebastidae from other species of Scorpaenidae was the latest, which began ~17.96 million years ago and the evolutionary rate of Sebastidae fishes were similar to the average rate of other subfamilies of Scorpaenidae. In summary, the taxonomic status of Sebastidae maybe coincides with the subfamilies of Scorpaenidae according to the result.

## Conclusions

In the present study, the complete mitogenomes of *S. tertius*, *S. albofasciatus*, and *S. marmoratus* were successfully determined. Their mitogenomes were with a total length of 16910 bp in *S. tertius*, 17056 bp in *S. albofasciatus*, and 17580 bp in *S. marmoratus*, respectively. A total of 22, 275, and 269 bp tandem repetitive sequences were respectively detected in three mitogenomes, which may be a typical characteristic of *Sebastiscus* fish. The ratio of  $K_a$  and  $K_s$  indicated that three species were suffering a purifying selection, while the ND2 and ATP8 showed the highest  $K_a/K_s$  values. Both ML and BI analyses indicated that *Sebastiscus* was monophyletic and *S. marmoratus* was a sister clade to *S. tertius* and *S. albofasciatus*. That is to say, the taxonomic status of Sebastidae, well supported by results of a phylogenetic tree, should be subfamily Sebastinae. We believe the present study will greatly improve our understanding of the evolution profile and phylogenetic position in Scorpaeniformes, which could benefit resource management and species protection in fishery and aquaculture.

## Data Availability

The data used in the manuscript can be found on NCBI website (<https://www.ncbi.nlm.nih.gov/>) by accession number.

## Competing Interests

The authors declare that there are no competing interests associated with the manuscript.

## Funding

This work was supported by the National Key R&D Program of China [grant number 2019YFD0901301]; and the National Natural Science Foundation of China [grant number 41776171].

## Author Contribution

Chenghao Jia: Methodology, Validation, Formal analysis, Writing original draft. Xiumei Zhang: Validation, Supervision, Writing review and editing. Shengyong Xu, Tianyan Yang and Takashi Yanagimoto: Resources, Writing review and editing. Tianxiang Gao: Conceptualization, Validation, Supervision, Writing review and editing, Funding acquisition. All authors have read and agreed to the published version of the manuscript.

## Acknowledgements

We sincerely thank the reviewers for their critique and suggestions.

## Abbreviations

BI, Bayesian Inference;  $K_a$ , nonsynonymous substitution;  $K_s$ , synonymous substitution; ML, maximum likelihood; PCG, protein-coding gene; rRNA, ribosomal RNA; RSCU, relative synonymous codon usage; tRNA, transfer RNA.

## References

- Nelson, J.S. (2006) *Fishes of the World*, 4th, p. 468, John Wiley and Sons Press, New York, United States
- Ishida, M. (1994) Phylogeny of the suborder Scorpaenoidei (Pisces: Scorpaeniformes). *Bull. Nansei Natl. Fish. Res. Inst.* **27**, 1–112
- Imamura, H. (2004) Phylogenetic relationships and new classification of the superfamily Scorpaenoidea (Actinopterygii: Perciformes). *Species Diversity* **9**, 1–36, <https://doi.org/10.12782/specdiv.9.1>
- Colton, M.A. and Larson, R.J. (2007) Aspects of the life history of treefish, *Sebastes serripes* (Sebastidae). *California Cooperative Oceanic Fisheries Investigations Report* **48**, <https://doi.org/10.1111/j.1365-2095.2007.00501.x>
- Bakay, Y.I. (2011) Ecological and parasitological characteristics of redfish *Sebastes mentella* (Scorpaeniformes: Sebastidae) from the Norwegian Sea and adjacent waters. *J. Ichthyol.* **51**, 90–97, <https://doi.org/10.1134/S0032945211010036>
- Morishita, S., Kawai, T. and Motomura, H. (2018) *Sebastes vibrantus*, a new species of rockfish (Sebastidae) from Indonesia and Taiwan. *Ichthyol. Res.* **65**, 423–432, <https://doi.org/10.1007/s10228-018-0632-9>
- Eigenmann, C.H. and Beeson, C.H. (1894) A revision of the fishes of the subfamily Sebastinae of the Pacific coast of America. *Proc. Natl. Museum* **17**, 375–407, <https://doi.org/10.5479/si.00963801.1009.375>
- Barsukov, V.V. (1981) A brief review of the subfamily Sebastinae. *J. Ichthyol.* **21**, 1–26
- Nelson, J.S. (1994) *Fishes of the World*, 3rd, p. 600, John Wiley and Sons Press, New York, United States
- Katoh, M. and Tokimura, M. (2001) Genetic and morphological identification of *Sebastes tertius* in the east china sea (Scorpaeniformes: Scorpaenidae). *Ichthyol. Res.* **48**, 247–255
- Xu, T.J., Cheng, Y.Z., Liu, X.Z. et al. (2011) The complete mitochondrial genome of the marbled rockfish *Sebastes marmoratus* (Scorpaeniformes, Scorpaenidae): genome characterization and phylogenetic considerations. *Mol. Biol.* **45**, 434–445, <https://doi.org/10.1134/S0026893311020191>
- Jang, Y.S., Park, K.J., Kim, K.Y. et al. (2016) The complete mitochondrial genome of *Sebastes pachycephalus* (Scorpaenidae, Scorpaeniformes) from the east sea, Korea. *Mitochondrial DNA Part A* **27**, 69–70, <https://doi.org/10.3109/19401736.2013.873904>
- Jordan, D.S. and Starks, E.C. (1904) A review of the Japanese fishes of the family of Agonidae. *Proc. U.S. Natl. Museum* **27**, 575–599, <https://doi.org/10.5479/si.00963801.27-1365.575>
- Chen, D.G. and Zhang, M.Z. (2015) *Marine Fishes of China*, 1st, pp. 764–765, Ocean University of China Press, Qingdao, China
- Matsubara, K. (1943a) Studies on the Scorpaenoid fishes of Japan. Anatomy, phylogeny and taxonomy (I). *Trans. Shigenkagaku Kenkyusyo* **1**, 1–170
- Matsubara, K. (1943b) Studies on the Scorpaenoid fishes of Japan. Anatomy, phylogeny and taxonomy (II). *Trans. Shigenkagaku Kenkyusyo* **2**, 171–485
- Barsukov, V.V. and Chen, L.C. (1978) Review of the subgenus *Sebastes* (Sebastes, Scorpaenidae) with a description of a new species. *Voprosy Ikhtiol.* **18**, 195–210
- Washington, B.B., Eschmeyer, W.N. and Howe, K.M. (1984) Scorpaeniformes: relationships. In *Ontogeny and Systematics of Fishes* (Moser, H.G., Richards, W.J., Cohen, D.M., Fahay, M.P., Kendall, Jr, A.W. and Richardson, S.L., eds), pp. 438–447, American Society of Ichthyologists and Herpetologists, New York, United States
- Amaoka, K. (1984) *Sebastes tertius*. In *The Fishes of The Japanese Archipelago* (Masuda, H. and Amaoka, K., eds), p. 313, Tokai University Press, Tokyo, Japan
- Shimizu, T. (1984a) *Sebastes marmoratus* (Cuvier). In *The Fishes of The Japanese Archipelago* (Masuda, H., Amaoka, K., Araga, C., Uyeno, T. and Yoshino, T., eds), p. 313, Tokai University Press, Tokyo, Japan
- Shimizu, T. (1984b) *Sebastes albofasciatus* (Lacepède). In *The Fishes of The Japanese Archipelago* (Masuda, H., Amaoka, K., Araga, C., Uyeno, T. and Yoshino, T., eds), p. 313, Tokai University Press, Tokyo, Japan
- Lacepède, H. (1802) *Histoire Naturelle des Poissons*, vol. 4, Plassan, Paris, France
- Cuvier, G. and Valenciennes, A. (1829) *Histoire naturelle des poissons. Livre quatrième. Des acanthoptérygiens à joue cuirassée*, vol. 4, Levrault, Paris, France
- Nakabo, T. and Kai, Y. (2013) Sebastidae. In *Fishes of Japan with Pictorial Keys to The Species*, 3rd, (Nakabo, T., ed.), pp. 1933–1938, Tokai University Press, Hadano, Japan
- Groves, P. and Shields, G.F. (1996) Phylogenetics of the caprinae based on cytochrome b sequence. *Mol. Phylogenet. Evol.* **5**, 467–476, <https://doi.org/10.1006/mpev.1996.0043>
- Yan, C., Duanmu, X., Zeng, L. et al. (2019) Mitochondrial DNA: distribution, mutations, and elimination. *Cells* **8**, 379, <https://doi.org/10.3390/cells8040379>
- Nielsen, J.L., Graziano, S.L. and Seitz, A.C. (2010) Fine-scale population genetic structure in Alaskan Pacific halibut (*Hippoglossus stenolepis*). *Conserv. Genet.* **11**, 999–1012, <https://doi.org/10.1007/s10592-009-9943-8>
- Cheng, J., Ma, G.Q., Miao, Z.Q. et al. (2012) Complete mitochondrial genome sequence of the spiny head croaker *Collichthys lucidus* (Perciformes, Sciaenidae) with phylogenetic considerations. *Mol. Biol. Rep.* **39**, 4249–4259, <https://doi.org/10.1007/s11033-011-1211-6>



- 29 Zhang, L., Cai, Y.Y., Yu, D.N. et al. (2018) Gene characteristics of the complete mitochondrial genomes of *Paratoxodera polyacantha* and *Toxodera hauseri* (Mantodea: Toxoderidae). *PeerJ* **6**, e4595, <https://doi.org/10.7717/peerj.4595>
- 30 Bresch, H.F. (1984) Hybridization and introgression among species of sunfish (*Lepomis*): analysis by mitochondrial DNA and allozyme markers. *Genetics* **108**, 237–255
- 31 Michaclis, G.S. (1982) Mitochondrial DNA copy number in a bovine oocytes and somatic cell. *Dev. Biol.* **97**, 246–251, [https://doi.org/10.1016/0012-1606\(82\)90088-4](https://doi.org/10.1016/0012-1606(82)90088-4)
- 32 Yang, H., Xia, J., Zhang, J.E. et al. (2018) Characterization of the complete mitochondrial genome sequences of three croakers (Perciformes, Sciaenidae) and novel insights into the phylogenetics. *Int. J. Mol. Sci.* **19**, 17–41
- 33 Johansen, S., Guddal, P.H. and Johansen, T. (1990) Organization of the mitochondrial genome of Atlantic cod, *Gadus morhua*. *Nucleic Acids Res.* **18**, 411–419, <https://doi.org/10.1093/nar/18.3.411>
- 34 Stepien, C.A. (1997) Molecular systematics of fishes. In *Molecules and Morphology in Studies of Fish Evolution* (Carol, A.S. and Thomas, D.K., eds), pp. 1–11, Academic Press, Salt Lake, United States
- 35 Miya, M. and Nishida, M. (2000) Use of mitogenomic information in teleostean molecular phylogenetics: A tree-based exploration under the maximum parsimony optimality criterion. *Mol. Phylogenet. Evol.* **17**, 437–455, <https://doi.org/10.1006/mpev.2000.0839>
- 36 Sing, V.K., Mangalam, A.K., Dwivedi, S. et al. (1998) Primer premier: program for design of degenerate primers from a protein sequence. *BioTechniques* **24**, 318–319, <https://doi.org/10.2144/98242pf02>
- 37 Lowe, T.M. and Chan, P.P. (2016) tRNAscan-SE on-line: search and contextual analysis of transfer RNA genes. *Nucleic Acids Res.* **44**, 54–57, <https://doi.org/10.1093/nar/gkw413>
- 38 Benson, G. (1999) Tandem repeats finder: a program to analyze DNA sequences. *Nucleic Acids Res.* **27**, 573–580, <https://doi.org/10.1093/nar/27.2.573>
- 39 Iwasaki, W., Fukunaga, T., Isagozawa, R. et al. (2013) MitoFish and MitoAnnotator: a mitochondrial genome database of fish with an accurate and automatic annotation pipeline. *Mol. Biol. Evol.* **30**, 2531–2540, <https://doi.org/10.1093/molbev/mst141>
- 40 Sato, Y., Miya, M., Fukunaga, T. et al. (2018) MitoFish and MiFish Pipeline: a mitochondrial genome database of fish with an analysis pipeline for environmental DNA metabarcoding. *Mol. Biol. Evol.* **35**, 1553–1555, <https://doi.org/10.1093/molbev/msy074>
- 41 Tamura, K., Peterson, D., Peterson, N. et al. (2011) MEGA5: Molecular evolutionary genetics analysis using maximum likelihood, evolutionary distance, and maximum parsimony methods. *Mol. Biol. Evol.* **28**, 2731–2739, <https://doi.org/10.1093/molbev/msr121>
- 42 Ronquist, F., Teslenko, M., Mark, P. et al. (2012) MrBayes 3.2: Efficient Bayesian Phylogenetic Inference and model choice across a large model space. *System. Biol.* **61**, 539–542, <https://doi.org/10.1093/sysbio/sys029>
- 43 Sudhir, K., Glen, S., Michael, L. et al. (2018) MEGA X: molecular evolutionary genetics analysis across computing platforms. *Mol. Biol. Evol.* **6**, <https://doi.org/10.1093/molbev/msy096>
- 44 Kumar, S., Stecher, G., Suleski, M. et al. (2017) TimeTree: a resource for timelines, timetrees, and divergence times. *Mol. Biol. Evol.* **34**, 1812–1819, <https://doi.org/10.1093/molbev/msx116>
- 45 Oh, D.J., Kim, J.Y., Lee, J.A. et al. (2007) Complete mitochondrial genome of the rock bream *Oplegnathus fasciatus* (Perciformes, Oplegnathidae) with phylogenetic considerations. *Gene* **392**, 174–180, <https://doi.org/10.1016/j.gene.2006.12.007>
- 46 Catanese, G., Machado, M. and Infante, C. (2010) Evolutionary relatedness of mackerels of the genus *Scomber* based on complete mitochondrial genomes: strong support to the recognition of Atlantic *Scomber colias* and Pacific *Scomber japonicus* as distinct species. *Gene* **452**, 35–43, <https://doi.org/10.1016/j.gene.2009.12.004>
- 47 Li, Y., Song, N., Lin, L. et al. (2014) The complete mitochondrial genome of *Pampus echinogaster* (Perciformes: Stromateidae). *Mitochondrial DNA Part A* **27**, 289–290, <https://doi.org/10.3109/19401736.2014.892081>
- 48 Li, N., Song, N. and Gao, T.X. (2015) The complete mitochondrial genome of Japanese *Ammodytes personatus* (Perciformes, Ammodytidae). *Mitochondrial DNA* **26**, 781–782, <https://doi.org/10.3109/19401736.2013.855750>
- 49 Xiao, J., Song, N., Gao, T. and Roland, J.M. (2014a) The complete mitochondrial genome of *Sillago indica* (Perciformes: Sillaginidae). *Mitochondrial DNA Part A* **27**, 1445–1446, <https://doi.org/10.3109/19401736.2014.953085>
- 50 Xiao, J., Song, N., Gao, T. and Zhao, Y. (2014b) The complete mitochondrial genome of *Sillago asiatica* (Perciformes: Sillaginidae). *Mitochondrial DNA Part A* **27**, 1644–1645
- 51 Liu, Z., Song, N., Yanagimoto, T. et al. (2017) Complete mitochondrial genome of three fish species (Perciformes: Amblyopinae): Genome description and phylogenetic relationships. *Pakistan J. Zool.* **49**, 107–115, <https://doi.org/10.17582/journal.pjz/2017.49.1.107.115>
- 52 Ruan, H., Li, M., Li, Z. et al. (2020) Comparative analysis of complete mitochondrial genomes of three *Gerres* fishes (Perciformes: Gerreidae) and primary exploration of their evolution history. *Int. J. Mol. Sci.* **21**, 1874, <https://doi.org/10.3390/ijms21051874>
- 53 Ojala, D., Montoya, J. and Attardi, G. (1981) tRNA punctuation model of RNA processing in human mitochondria. *Nature* **290**, 470–474, <https://doi.org/10.1038/290470a0>
- 54 Nei, M. (1972) Genetic distance between populations. *Am. Nat.* **106**, 283–292, <https://doi.org/10.1086/282771>
- 55 Zhu, K.C., Liang, Y.Y., Wu, N. et al. (2017) Sequencing and characterization of the complete mitochondrial genome of Japanese Swellshark (*Cephaloscyllium umbratile*). *Sci. Rep.* **7**, 15299, <https://doi.org/10.1038/s41598-017-15702-0>
- 56 Yang, Z. and Bielawski, J.P. (2000) Statistical methods for detecting molecular adaptation. *Trends Ecol. Evol.* **15**, 496–503, [https://doi.org/10.1016/S0169-5347\(00\)01994-7](https://doi.org/10.1016/S0169-5347(00)01994-7)
- 57 Shen, X., Pu, Z., Chen, X. et al. (2019) Convergent evolution of mitochondrial genes in deep-sea fishes. *Front. Genet.* **10**, 925, <https://doi.org/10.3389/fgene.2019.00925>
- 58 Schaack, S., Ho, E.K. and Macrae, F. (2019) Disentangling the intertwined roles of mutation, selection and drift in the mitochondrial genome. *Philos. Trans. R. Soc. B* **375**, 20190173, <https://doi.org/10.1098/rstb.2019.0173>

- 59 Teixeira, R.L. and Helmer, J.L. (1997) Ecology of young mojarra (Pisces: Gerreidae) occupying the shallow waters of a tropical estuary. *Rev. Bras. Biol.* **57**, 637–646
- 60 Chollet, V.J., DeLa, C.A.J. and Garcia, R.F.J. (2014) Comparison of urohyal bone morphology among gerreid fish (Perciformes: Gerreidae). *Italian J. Zool.* **81**, 246–255, <https://doi.org/10.1080/11250003.2014.912681>
- 61 Nielsen, R. (2005) Molecular signatures of natural selection. *Annu. Rev. Genet.* **39**, 197–218, <https://doi.org/10.1146/annurev.genet.39.073003.112420>
- 62 Xiang, D., Shen, X., Pu, Z. et al. (2018) Convergent evolution of human-isolated H7N9 avian influenza A viruses. *J. Infect. Dis.* **217**, 1699–1707, <https://doi.org/10.1093/infdis/jiy082>
- 63 Barrientos, A., Barros, M.H., Valnot, I. et al. (2002) Cytochrome oxidase in health and disease. *Gene* **286**, 53–63, [https://doi.org/10.1016/S0378-1119\(01\)00803-4](https://doi.org/10.1016/S0378-1119(01)00803-4)
- 64 Song, Y.S., Kim, I.H., Kim, Y.K. et al. (2016) Complete mitochondrial genome of *Hemilepidotus gilberti*, (Scorpaeniformes: Cottidae). *Mitochondrial DNA Part B* **1**, 962–963, <https://doi.org/10.1080/23802359.2016.1266706>
- 65 Dray, L., Neuhofer, M., Diamant, A. et al. (2016) The complete mitochondrial genome of the devil firefish *Pterois miles* (Bennett, 1828) (Scorpaenidae). *Mitochondrial DNA* **27**, 783–784, <https://doi.org/10.3109/19401736.2014.945565>
- 66 Anderson, S., Bankier, A.T., Barrell, B.G. et al. (1981) Sequence and organization of the human mitochondrial genome. *Nature* **290**, 457–465, <https://doi.org/10.1038/290457a0>
- 67 Frazer-Abel, A.A. and Hagerman, P.J. (1999) Determination of the angle between the acceptor and anti codon stems of a truncated mitochondrial tRNA. *J. Mol. Biol.* **285**, 581–593, <https://doi.org/10.1006/jmbi.1998.2320>
- 68 Manehado, M., Catanese, G. and Infantete, C. (2004) Complete mitochondrial DNA sequence of the Atlantic Bluefin tuna *Thunnus thynnus*. *Fisheries Sci.* **70**, 68–70, <https://doi.org/10.1111/j.1444-2906.2003.00772.x>
- 69 Du, C., He, S.L., Song, X.H. et al. (2016) The complete mitochondrial genome of *Epicauta chinensis* (Coleoptera: Meloidae) and phylogenetic analysis among coleopteran insects. *Gene* **578**, 274–280, <https://doi.org/10.1016/j.gene.2015.12.036>
- 70 Jin, X., Liu, X. and Sun, Y. (2013) Complete mitochondrial genome of the greenspot goby *Acentrogobius chlorostigmatoides* (Perciformes, Gobioidae): repetitive sequences in the control region. *Mitochondrial DNA* **24**, 400–402, <https://doi.org/10.3109/19401736.2013.763244>
- 71 Jin, X., Wang, R., Wei, T. et al. (2015) Complete mitochondrial genome sequence of *Tridentiger bifasciatus* and *Tridentiger barbatus* (Perciformes, Gobiidae): a mitogenomic perspective on the phylogenetic relationships of Gobiidae. *Mol. Biol. Rep.* **42**, 253–265, <https://doi.org/10.1007/s11033-014-3768-3>
- 72 Xiao, J. (2015) *The Complete Mitochondrial Genomes and Phylogenetic Analysis of Sillago species*, Ocean University of China, Qingdao, Shandong, China, Masters Thesis
- 73 Vodolazhskii, D.I., Kornienko, I.V. and Voinova, N.V. (2008) Hypervariability of the D-loop region in mitochondrial DNA of Russian sturgeon *Acipenser gueldenstaedtii* (Acipenseriformes, Acipenseridae). *J. Ichthyol.* **48**, 188–197, <https://doi.org/10.1134/S0032945208020057>
- 74 Rand, D.M. and Harrison, R.G. (1989) Molecular population genetics of mtDNA size variation in crickets. *Genetics* **121**, 551–569
- 75 Wilkinson, G.S. and Chapman, A.M. (1991) Length and sequence variation in evening bat D-loop mtDNA. *Genetics* **128**, 607–617
- 76 Zardoya, R., Garrido, P.A. and Bautista, J.M. (1995) The complete nucleotide sequence of the mitochondrial DNA genome of the rainbow trout, *Oncorhynchus mykiss*. *J. Mol. Evol.* **41**, 942–951, <https://doi.org/10.1007/BF00173174>
- 77 Noack, K., Zardoya, R. and Meyer, A. (1996) The complete mitochondrial DNA sequence of the bichir (*Polypterus ornatipinnis*), a basal ray-finned fish: ancient establishment of the consensus vertebrate gene order. *Genetics* **144**, 1165–1180
- 78 Fonseca, M.M. and Harris, D.J. (2008) Relationship between mitochondrial gene rearrangements and stability of the origin of light strand replication. *Genet. Mol. Biol.* **31**, 566–574, <https://doi.org/10.1590/S1415-47572008000300027>
- 79 Hixson, J.E., Wong, T.W. and Clayton, D.A. (1986) Both the conserved stem-loop and divergent 5'-flanking sequences are required for initiation at the human mitochondrial origin of light-strand DNA replication. *J. Biol. Chem.* **261**, 2384–2390
- 80 Cheng, Y.Z., Xu, T.J., Shi, G. et al. (2010) Complete mitochondrial genome of the miyu croaker *Miichthys miiuy* (Perciformes, Sciaenidae) with phylogenetic consideration. *Mar. Genomics* **3**, 201–209, <https://doi.org/10.1016/j.margen.2010.10.003>
- 81 Ishii, T. (1997) The study of speciation from analysis of mitochondrial DNA structures among the fishes in Scorpaenidae. *Sophia Life* **16**, 105–111
- 82 Yoshiaki, K., Nakayama, K. and Nakabo, T. (2003) Molecular phylogenetic perspective on speciation in the genus *Sebastes* (Scorpaenidae) from the Northwest Pacific and the position of *Sebastes* within the subfamily Sebastinae. *Ichthyol. Res.* **50**, 239–244
- 83 John, R.H. and Rusell, D.V. (2007) The origin, evolution and diversification of rockfishes of the genus *Sebastes* (Cuvier). *Mol. Phylogenet. Evol.* **44**, 790–811
- 84 Nelson, J.S., Grande, T.C. and Wilson, M.V.H. (2016) *Fishes of the World*, 5th, p. 321, John Wiley and Sons Press, New York, United States
